# Supplementary material for: tert-Butanol intervention enables chemoselective conversion of xylose to furfuryl alcohol over heteropolyacids
Source: Royal Society of Chemistry journal article supplement (doi:10.1039/d0gc02001j), 2020-01-01
Supplement: d0gc02001j1.pdf [file d0gc02001j1.pdf]

***tert*-Butanol intervention enables chemoselective conversion of  
xylose to furfuryl alcohol over heteropolyacids**

Lincai Peng\*, Mengmeng Wang, Hui Li, Juan Wang, Junhua Zhang and Liang He

BiomassChem Group, Faculty of Chemical Engineering, Kunming University of Science and  
Technology, Kunming, 650500, China

\*Corresponding author. E-mail address: penglincai@kust.edu.cn (L. Peng).

**SUPPLEMENTARY  
INFORMATION**

## Table of Contents:

**Table S1.** The current state-of-the-art processes for direct conversion of xylose to FA.

**Table S2.** Comparison for the direct conversion of xylan and xylose to FA in *tert*-butanol/formic acid over HSiW.

**Table S3.** Carbon balance for xylose processing in *tert*-butanol/formic acid over HSiW.

**Fig. S1.** Conversion of xylose (a) and FF (b) in *tert*-butanol over metal-free acid catalysts.

Reaction conditions: 1 mmol xylose or FF, 0.05 g catalyst, 30 mL *tert*-butanol, 130 °C, 2 h.

**Fig. S2.** GC spectra of the typical samples from the conversion of xylose catalyzed by HSiW in *tert*-butanol medium (a) and *tert*-butanol/formic acid medium (b).

**Fig. S3.** Effect of HSiW dosage on the conversion of xylose to FA. Reaction conditions: 1 mmol xylose, 27 mL *tert*-butanol, 3 mL formic acid, 130 °C, 2 h.

**Fig. S4.** Effect of substrate concentration on the conversion of xylose to FA. Reaction conditions: 27 mL *tert*-butanol, 3 mL formic acid, 0.1 mmol HSiW, 130 °C, 2 h.

**Fig. S5.** Effect of reaction temperature as a function of time on FA conversion. Reaction conditions: 1 mmol FA, 0.1 mmol HSiW, 27 mL *tert*-butanol, 3 mL formic acid.

**Fig. S6.** Effect of reaction temperature as a function of time on FF conversion (a) and FA yield (b). Reaction conditions: 1 mmol FF, 0.1 mmol HSiW, 27 mL *tert*-butanol, 3 mL formic acid.

**Fig. S7.** The correlation between all experiment and predicted values for the conversion of FA (a), FF (b), and xylose (c).

**Fig. S8.** Arrhenius plot of the main reactions (a) and side reactions (b) for the conversion of xylose to FA.

**Fig. S9.** FTIR (a) and XRD (b) results of the fresh and spent HSiW after five recycles.

**Table S1.** The current state-of-the-art processes for direct conversion of xylose to FA.

| Entry | Solvent                                       | Catalyst                                                     | Reaction condition                                                         | Xylose<br>conversion,<br>% | FA<br>yield,<br>% | FA<br>selectivity,<br>% | Ref.         |
|-------|-----------------------------------------------|--------------------------------------------------------------|----------------------------------------------------------------------------|----------------------------|-------------------|-------------------------|--------------|
| 1     | <i>iso</i> -Propanol + H <sub>2</sub> O       | ZrO <sub>2</sub> -SO <sub>4</sub> + Pt-SiO <sub>2</sub>      | 130 °C, 6 h, 30 bar H <sub>2</sub>                                         | 65                         | 33.2              | 51                      | 9            |
| 2     | <i>iso</i> -Propanol + H <sub>2</sub> O       | Pt-ZrO <sub>2</sub> -SO <sub>4</sub>                         | 130 °C, 6 h, 30 bar H <sub>2</sub>                                         | 32                         | 8.6               | 27                      | 10a          |
| 3     | <i>iso</i> -Propanol + H <sub>2</sub> O       | Pt-SBA-15-SO <sub>3</sub> H                                  | 130 °C, 6 h, 30 bar H <sub>2</sub>                                         | 56                         | 48.7              | 87                      | 10b          |
| 4     | <i>n</i> -Butanol + H <sub>2</sub> O          | Cu/SBA-15-SO <sub>3</sub> H                                  | 140 °C, 6 h, 40 bar H <sub>2</sub>                                         | 93.7                       | 62.6              | 66.8                    | 11           |
| 5     | $\gamma$ -Butyrolactone +<br>H <sub>2</sub> O | H $\beta$ zeolite +<br>Cu/ZnO/Al <sub>2</sub> O <sub>3</sub> | 150 °C, 10 h, 1 bar H <sub>2</sub> feed of<br>25 mL/min, fixed-bed reactor | 99.9                       | 87.2              | 87.3                    | 12           |
| 6     | <i>iso</i> -Propanol + H <sub>2</sub> O       | Zeolite beta                                                 | 130 °C, 1 h, no external H <sub>2</sub>                                    | 12.5                       | 9.4               | 75                      | 13a          |
| 7     | <i>iso</i> -Propanol + H <sub>2</sub> O       | [Al]-SBA-15                                                  | 130 °C, 4 h, no external H <sub>2</sub>                                    | ~13                        | ~12               | 90-95                   | 13b          |
| 8     | <i>tert</i> -Butanol +<br>Formic acid         | H <sub>4</sub> SiW <sub>12</sub> O <sub>40</sub>             | 130 °C, 3 h, no external H <sub>2</sub>                                    | 99.1                       | 90.1              | 90.9                    | This<br>work |

**Table S2.** Comparison for the direct conversion of xylan and xylose to FA in *tert*-butanol/formic acid over HSiW<sup>a</sup>.

| Entry | Raw material                | Reaction time, h | FA yield, % |
|-------|-----------------------------|------------------|-------------|
| 1     | Xylan <sup>b</sup> , 0.15 g | 2                | 78.6        |
| 2     | Xylan, 0.15 g               | 3                | 85.0        |
| 3     | Xylose, 1 mmol              | 2                | 84.2        |
| 4     | Xylose, 1 mmol              | 3                | 90.1        |

<sup>a</sup> Reaction conditions: 0.1 mmol HSiW, 27 mL *tert*-butanol, 3 mL formic acid, 130 °C.

<sup>b</sup> Xylan is derived from corncob and supplied by Aladdin Reagent (Shanghai, China).

**Table S3.** Carbon balance for xylose processing in *tert*-butanol/formic acid over HSiW<sup>a</sup>.

| Ingredient                           | Proportion, % |
|--------------------------------------|---------------|
| Xylose conversion rate               | 100           |
| Xylose convert into FF               | 6.1           |
| Xylose convert into FA               | 90.1          |
| Xylose convert into BFE <sup>b</sup> | 0.5           |
| Xylose convert into solid polymers   | 1.9           |
| Unknown products                     | 1.4           |

<sup>a</sup> Reaction conditions: 1 mmol xylose, 0.1 mmol HSiW, 27 mL *tert*-butanol, 3 mL formic acid, 130 °C, 3 h.

<sup>b</sup> BFE = *tert*-butyl furfuryl ether

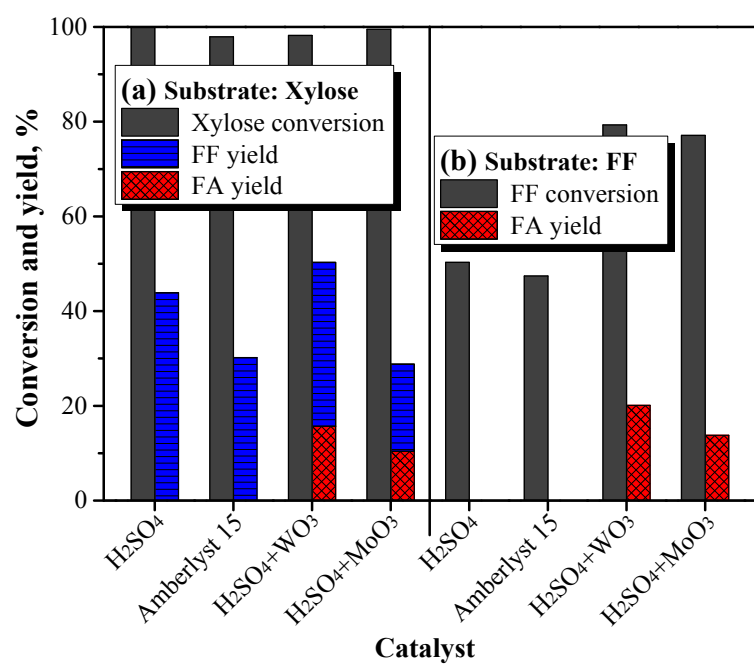

**Fig. S1.** Conversion of xylose (a) and FF (b) in *tert*-butanol over metal-free acid catalysts.

Reaction conditions: 1 mmol xylose or FF, 0.05 g catalyst, 30 mL *tert*-butanol, 130 °C, 2 h.

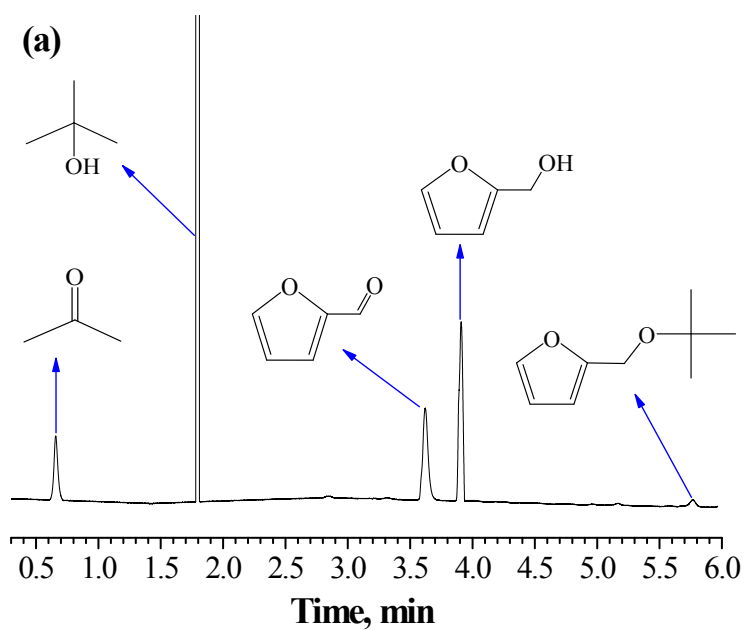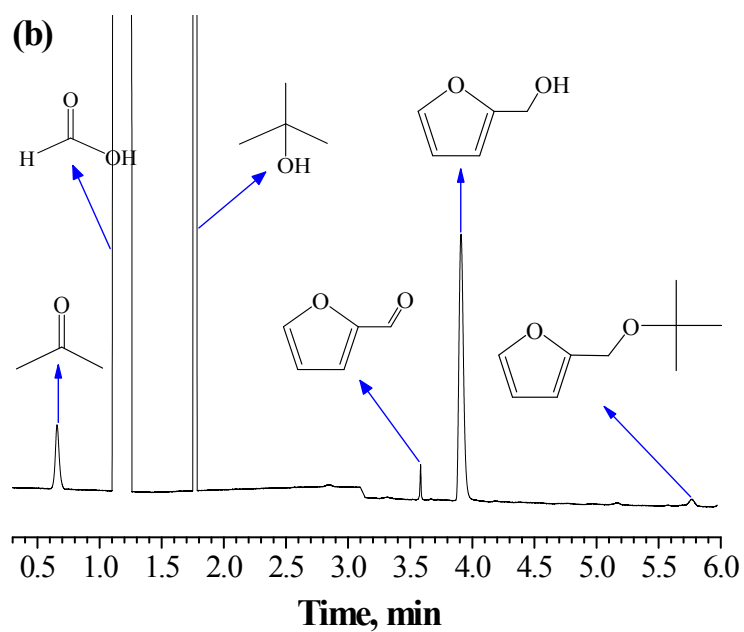

**Fig. S2.** GC spectra of the typical samples from the conversion of xylose catalyzed by HSiW in *tert*-butanol medium (a) and *tert*-butanol/formic acid medium (b).

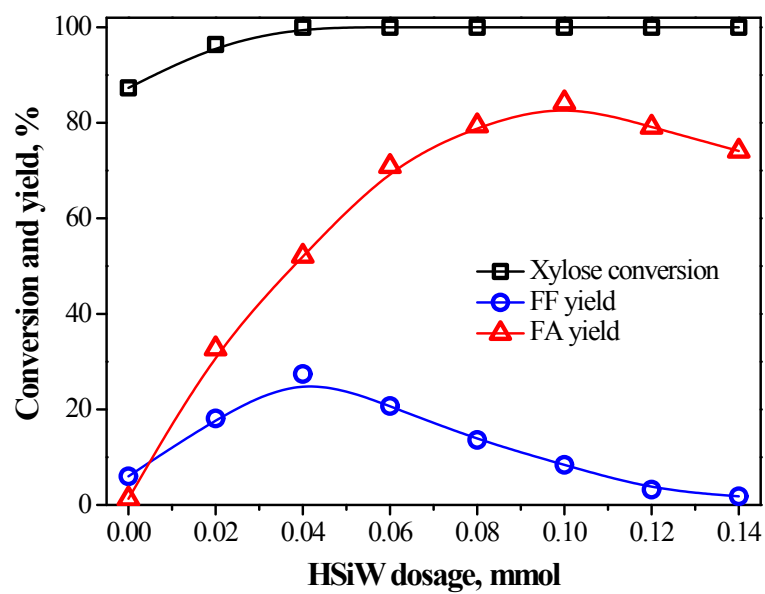

**Fig. S3.** Effect of HSiW dosage on the conversion of xylose to FA. Reaction conditions: 1 mmol xylose, 27 mL *tert*-butanol, 3 mL formic acid, 130 °C, 2 h.

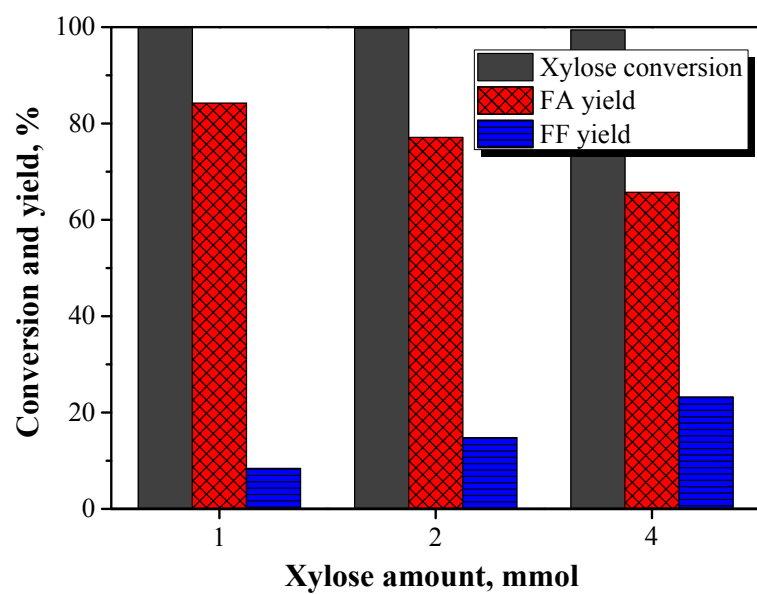

**Fig. S4.** Effect of substrate concentration on the conversion of xylose to FA. Reaction conditions: 0.1 mmol HSiW, 27 mL *tert*-butanol, 3 mL formic acid, 130 °C, 2 h.

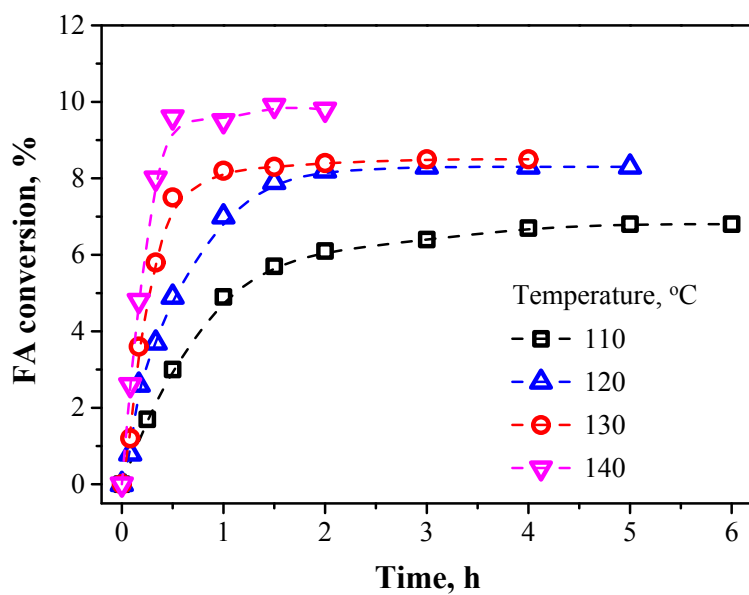

**Fig. S5.** Effect of reaction temperature as a function of time on FA conversion. Reaction conditions: 1 mmol FA, 0.1 mmol HSiW, 27 mL *tert*-butanol, 3 mL formic acid.

When FA was used as the starting substrate, the decomposition of FA as a function of reaction time can be represented by the following equation:

$$\frac{dC_{FA}}{dt} = -k_5 C_{FA} \quad (S1)$$

Where  $k_5$  is the reaction rate constant of FA decomposition, and  $C_{FA}$  is the FA concentration. The experimental data in Fig. S5 were fitted by Equation (S1) to obtain  $k_5$ .

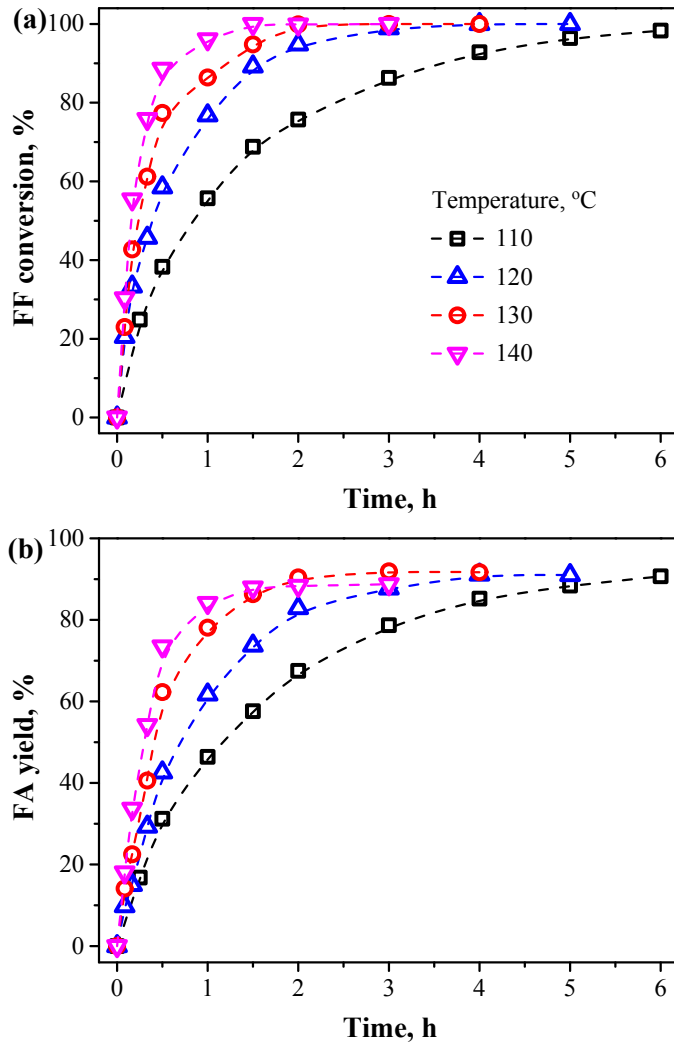

**Fig. S6.** Effect of reaction temperature as a function of time on FF conversion (a) and FA yield (b). Reaction conditions: 1 mmol FF, 0.1 mmol HSiW, 27 mL *tert*-butanol, 3 mL formic acid.

When FF was used as the starting substrate, the conversion of FF as a function of reaction time can be expressed by the following equations:

$$\frac{dC_{FF}}{dt} = -(k_3 + k_4)C_{FF} \quad (S2)$$

$$\frac{dC_{FA}}{dt} = k_3C_{FF} - k_5C_{FA} \quad (S3)$$

Where  $k_3$  and  $k_4$  are the reaction rate constants of FF conversion to FA and by-products, respectively.  $C_{FF}$  is the FF concentration. Based on the determined  $k_5$ , the experimental data in

Fig. S6 were fitted by Equations (S2) and (S3) to obtain  $k_3$  and  $k_4$ .

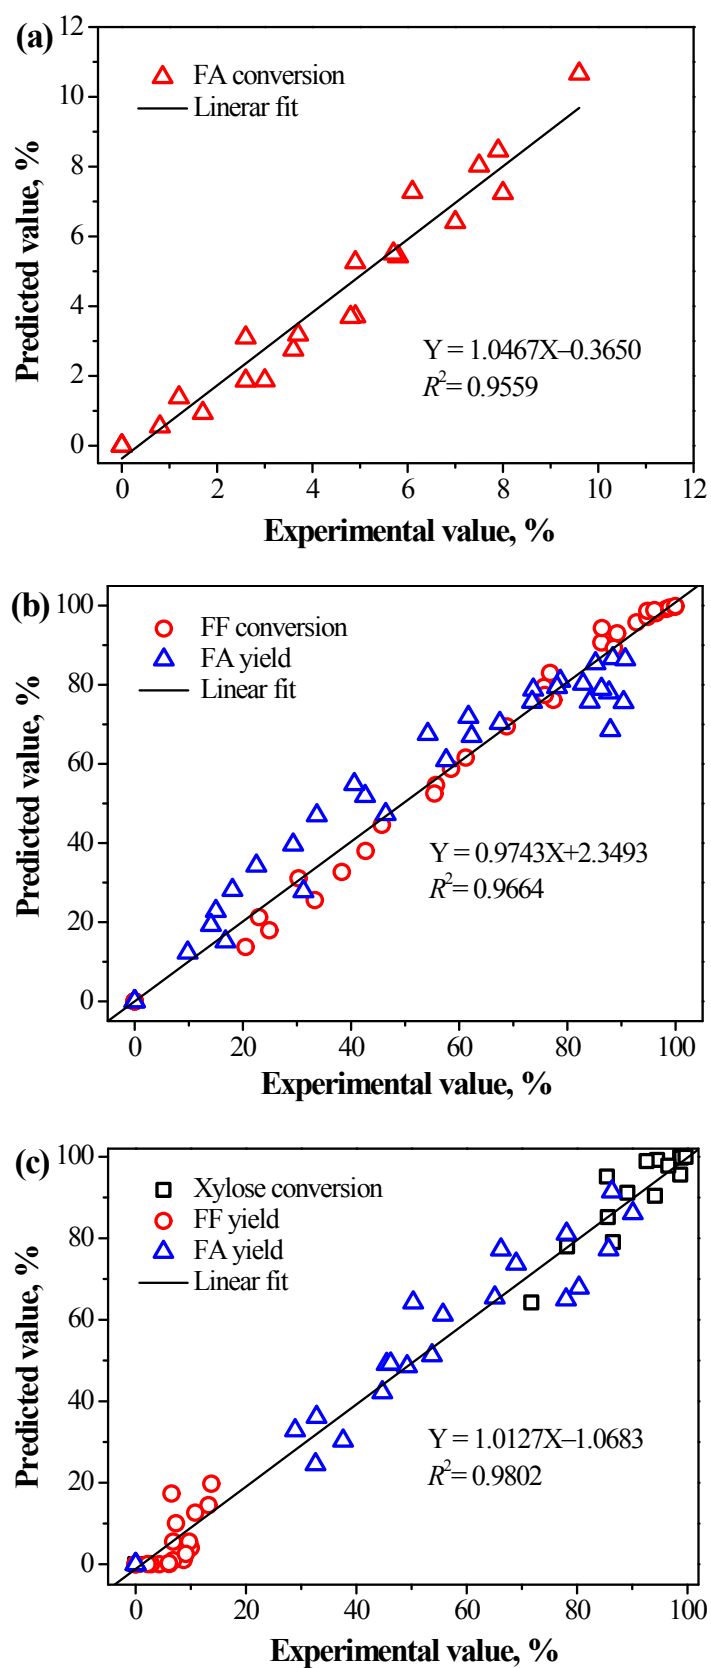

Fig. S7. The correlation between all experiment and predicted values for the conversion of FA

(a), FF (b), and xylose (c).

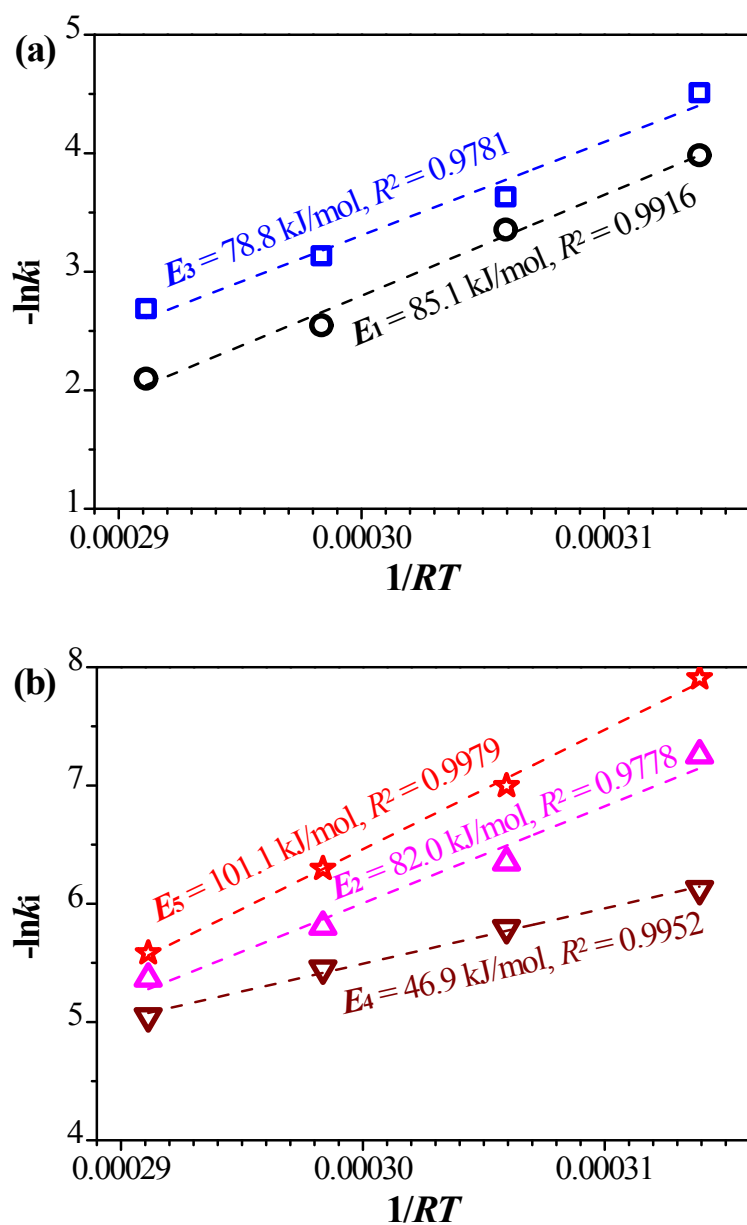

**Fig. S8.** Arrhenius plot of the main reactions (a) and side reactions (b) for the conversion of xylose to FA.

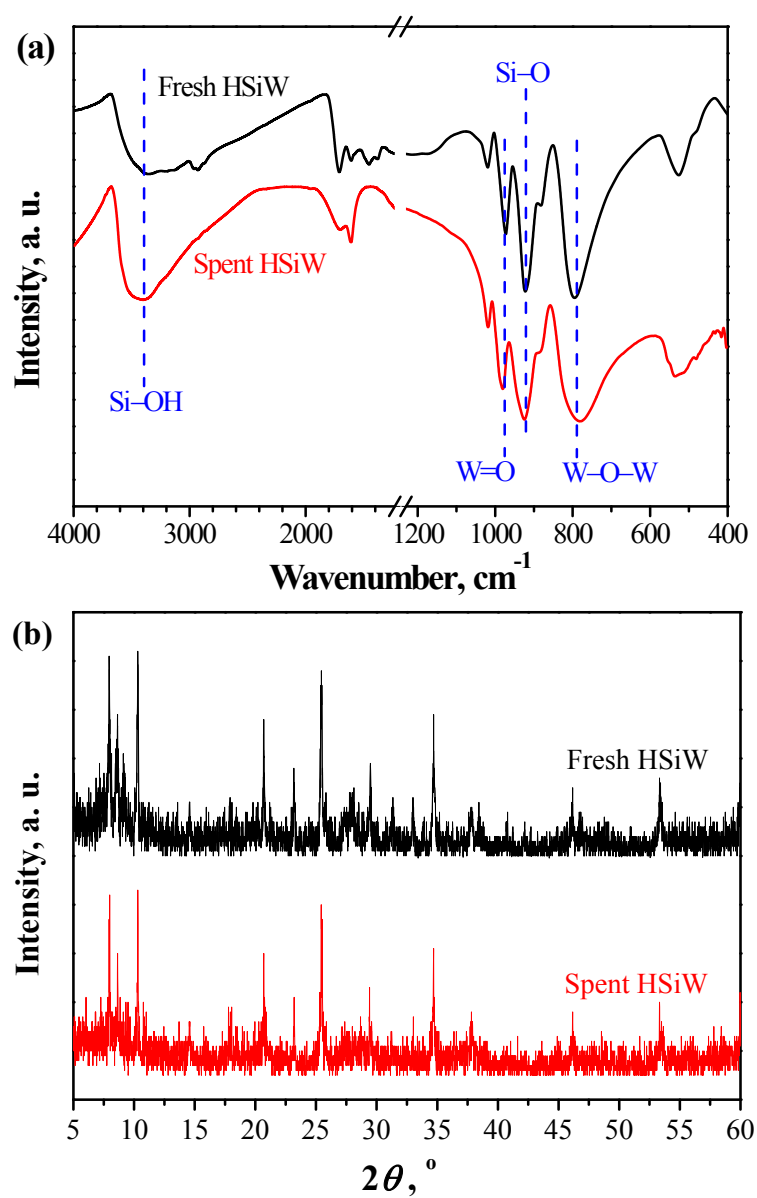

**Fig. S9.** FTIR (a) and XRD (b) results of the fresh and spent HSiW after five recycles.
